# Supplementary material for: An assessment of land energy balance over East Asia from multiple lines and the roles of Tibet Plateau, aerosols, and clouds
Source: Copernicus journal article supplement (doi:10.5194/acp-2022-451), 2022-06-27
Supplement: Supplementary file 1 [file acp-2022-451-supplement.pdf]

*Supplement of*

**An assessment of land energy balance over East Asia from multiple lines and the roles of Tibet Plateau, aerosols, and clouds**

Qiuyan Wang<sup>1,2,6</sup>, Hua Zhang<sup>1,2</sup>, Su Yang<sup>3</sup>, Qi Chen<sup>2</sup>, Xixun Zhou<sup>2</sup>, Bing Xie<sup>4</sup>,  
Yuying Wang<sup>1</sup>, Guangyu Shi<sup>1,5</sup>, Martin Wild<sup>6</sup>

<sup>1</sup> Collaborative Innovation Center on Forecast and Evaluation of Meteorological Disasters, Nanjing University of Information Science and Technology, Nanjing 210044, China

<sup>2</sup> State Key Laboratory of Severe Weather, Chinese Academy of Meteorological Sciences, Beijing 100081, China

<sup>3</sup> National Meteorological Information Center, China Meteorological Administration, Beijing 100081, China

<sup>4</sup> Laboratory for Climate Studies of China Meteorological Administration, National Climate Center, Beijing 100081, China

<sup>5</sup> State Key Laboratory of Numerical Modeling for Atmospheric Sciences and Geophysical Fluid Dynamics, Institute of Atmospheric Physics, Chinese Academy of Sciences, Beijing 100029, China

<sup>6</sup> Institute for Atmospheric and Climate Science, ETH Zurich, 8092 Zurich, Switzerland

*Corresponding to:* Hua Zhang, [huazhang@cma.gov.cn](mailto:huazhang@cma.gov.cn)

## Supplemental Figures and Tables.

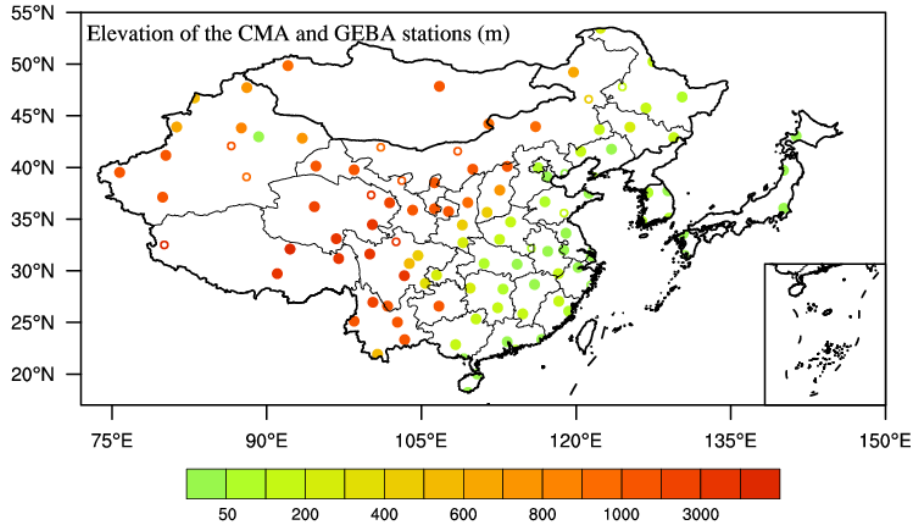

**Figure S1.** Geographical distribution and elevation (Units: m) of all observational sites from the CMA (99 sites) and GEBA (16 sites). The solid and hollow circles indicate rural (19 vs. 18 for all-sky and clear-sky conditions) and urban stations (96 vs. 74), respectively.

**Table S1.** CMA (99 stations) and GEBA (16 stations) observational sites sorted by station numbers, as well as their latitudes (positive north/negative south), longitudes (positive east/negative west), altitudes (m), station name, country/regions, data sources, and administrative level.

| Station NO. | lat   | lon    | Altitude | Station name, Country/region, data sources | Administrative level   |
|-------------|-------|--------|----------|--------------------------------------------|------------------------|
| 863         | 22.32 | 114.17 | 66       | Hong Kong (WRDC), China                    | city                   |
| 880         | 43.05 | 141.33 | 17       | Sapporo (WRDC+BSRN), Japan                 | city                   |
| 881         | 39.72 | 140.1  | 9        | Akita (WRDC), Japan                        | city                   |
| 886         | 36.05 | 140.13 | 25       | Tateno (WRDC+BSRN), Japan                  | city                   |
| 889         | 33.58 | 130.38 | 3        | Fukuoka (WRDC+BSRN), Japan                 | city                   |
| 892         | 31.57 | 130.55 | 4        | Kagoshima (WRDC), Japan                    | island                 |
| 893         | 27.08 | 142.18 | 4        | Chichijima (WRDC), Japan                   | island                 |
| 894         | 26.23 | 127.68 | 35       | Naha (WRDC), Japan                         | city                   |
| 895         | 24.33 | 124.17 | 6        | Ishigakijima (WRDC+BSRN), Japan            | island                 |
| 896         | 24.3  | 153.97 | 8        | Minamitorishima (WRDC+BSRN), Japan         | island                 |
| 901         | 37.75 | 128.9  | 26       | Kangnung (WRDC), Korea (South)             | city                   |
| 902         | 37.57 | 126.97 | 86       | Seoul (WRDC), Korea (South)                | city                   |
| 903         | 35.1  | 129.03 | 69       | Pusan (WRDC), Korea (South)                | city                   |
| 904         | 34.78 | 126.38 | 53       | Mokpo (WRDC), Korea (South)                | city                   |
| 906         | 49.85 | 92.07  | 934      | Ulaangom (WRDC), Mongolia                  | city                   |
| 908         | 47.85 | 106.75 | 1264     | Ulan-Bator (WRDC), Mongolia                | city                   |
| 50136       | 53.47 | 122.37 | 296      | Mohe, Heilongjiang (CMA)                   | city-governed district |
| 50468       | 50.25 | 127.45 | 165.8    | Heihe, Heilongjiang (CMA)                  | city-governed district |
| 50527       | 49.22 | 119.75 | 612.9    | Hailaer, Inner Mongolia (CMA)              | city-governed district |
| 50742       | 47.8  | 124.48 | 162.4    | Fuyu, Heilongjiang (CMA)                   | county                 |
| 50834       | 46.6  | 121.22 | 499.7    | Suolun, Inner Mongolia (CMA)               | town                   |
| 50873       | 46.82 | 130.28 | 81.2     | Jiamusi, Heilongjiang (CMA)                | city                   |

|       |       |        |        |                                   |                        |
|-------|-------|--------|--------|-----------------------------------|------------------------|
| 50953 | 45.75 | 126.77 | 146    | Haerbin, Heilongjiang (CMA)       | city                   |
| 51076 | 47.73 | 88.08  | 735.1  | Altay, Xinjiang (CMA)             | county-level city      |
| 51133 | 46.73 | 83     | 534.9  | Tacheng, Xinjiang (CMA)           | city                   |
| 51431 | 43.92 | 81.28  | 664    | Yining, Xinjiang (CMA)            | county-level city      |
| 51463 | 43.82 | 87.55  | 850.5  | Urumqi, Xinjiang (CMA)            | city                   |
| 51567 | 42.08 | 86.57  | 1055.3 | Yanqi, Xinjiang (CMA)             | county                 |
| 51573 | 42.97 | 89.23  | 34.5   | Turpan , Xinjiang (CMA)           | city                   |
| 51628 | 41.17 | 80.23  | 1103.8 | Aksu , Xinjiang (CMA)             | city-governed district |
| 51709 | 39.52 | 75.75  | 1289   | Kashgar, Xinjiang (CMA)           | city                   |
| 51777 | 39.08 | 88.05  | 950    | Ruoqiang, Xinjiang (CMA)          | county                 |
| 51828 | 37.12 | 79.92  | 1387   | hotan, Xinjiang (CMA)             | county-level city      |
| 52203 | 42.83 | 93.45  | 737.9  | Hami, Xinjiang (CMA)              | county-level city      |
|       |       |        |        |                                   | Banner, smaller than   |
| 52267 | 41.95 | 101.07 | 940.5  | Ejin Banner, Inner Mongolia (CMA) | county                 |
| 52418 | 40.13 | 94.78  | 1138.2 | Dunhuang, Gansu (CMA)             | county-level city      |
| 52533 | 39.77 | 98.48  | 1477.2 | Jiuquan, Gansu (CMA)              | city                   |
| 52681 | 38.72 | 103.1  | 1353.7 | Minqin, Gansu (CMA)               | county                 |
| 52754 | 37.33 | 100.13 | 3301.5 | Gangca, Qinghai (CMA)             | county                 |
|       |       |        |        |                                   | sub-prefecture-level   |
| 52818 | 36.2  | 94.63  | 2806.1 | Golmud, Qinghai (CMA)             | city                   |
| 52866 | 36.58 | 101.92 | 2244.2 | Xining, Qinghai (CMA)             | city                   |
| 52983 | 35.87 | 104.15 | 1874.4 | Lanzhou (Yuzhong), Gansu (CMA)    | city                   |
| 53068 | 44.22 | 111.53 | 964.8  | Erenhot, Inner Mongolia (CMA)     | city                   |
| 53336 | 41.57 | 108.52 | 1288   | Hailiut, Inner Mongolia (CMA)     | town                   |
| 53487 | 40.1  | 113.33 | 1067.6 | Datong, Shanxi (CMA)              | city                   |
| 53543 | 39.83 | 109.98 | 1460.4 | Dongsheng, Inner Mongolia (CMA)   | city-governed district |
| 53614 | 38.52 | 106.27 | 1111.5 | Yinchuan, Ningxia (CMA)           | city                   |
| 53772 | 37.8  | 112.6  | 783.7  | Taiyuan, Shanxi (CMA)             | city                   |
| 53817 | 36    | 106.27 | 1752.2 | Guyuan, Ningxia (CMA)             | city                   |
| 53845 | 36.6  | 109.5  | 957.8  | Yanan, Shannxi (CMA)              | city                   |
| 53923 | 35.73 | 107.63 | 1421   | Xifeng, Shannxi (CMA)             | city-governed district |
| 53963 | 35.65 | 111.37 | 434.4  | Houma, Shanxi (CMA)               | county-level city      |
| 54102 | 43.95 | 116.07 | 989.5  | Xilinhot , Inner Mongolia (CMA)   | city                   |
| 54135 | 43.67 | 122.25 | 179.5  | Tongliao, Inner Mongolia (CMA)    | city                   |
| 54161 | 43.9  | 125.22 | 236.8  | Changchun, Jilin (CMA)            | city                   |
| 54292 | 42.88 | 129.47 | 176.8  | Yanji, Jilin (CMA)                | county-level city      |
| 54324 | 41.55 | 120.45 | 168.7  | Chaoyang, Liaoning (CMA)          | city                   |
| 54342 | 41.77 | 123.43 | 41.6   | Shenyang, Liaoning (CMA)          | city                   |
| 54511 | 39.97 | 116.32 | 50.6   | Beijing (CMA)                     | city                   |
| 54527 | 39.1  | 117.17 | 3.3    | Tianjing (CMA)                    | city                   |
| 54539 | 39.42 | 118.9  | 10.5   | Laoting, Hebei (CMA)              | county                 |
| 54662 | 39.02 | 121.72 | 62.4   | Dalian, Liaoning (CMA)            | city                   |
| 54764 | 37.5  | 121.25 | 32.6   | Fushan, Shandong (CMA)            | city                   |
| 54823 | 36.68 | 116.98 | 51.6   | Jinan, Shandong (CMA)             | city                   |

|       |       |        |        |                            |                        |
|-------|-------|--------|--------|----------------------------|------------------------|
| 54936 | 35.58 | 118.83 | 107.4  | Ju, Shandong (CMA)         | county                 |
| 55228 | 32.5  | 80.08  | 4278   | Geer, Tibet (CMA)          | county                 |
| 55299 | 32.1  | 92.27  | 4366.1 | Naqu, Tibet (CMA)          | city                   |
| 55591 | 29.72 | 91.03  | 3658   | Lhasa, Tibet (CMA)         | city                   |
| 56029 | 33.1  | 96.75  | 3702.6 | Yushu, Qinghai (CMA)       | city                   |
| 56043 | 34.47 | 100.25 | 3719   | Guoluo, Qinghai (CMA)      | city                   |
| 56137 | 31.18 | 96.98  | 3175.4 | Changdu, Tibet (CMA)       | city                   |
| 56146 | 31.62 | 100    | 3393.5 | Ganzi, Sichuan (CMA)       | city                   |
| 56173 | 32.8  | 102.55 | 3492.7 | Hongyuan, Sichuan (CMA)    | county                 |
| 56187 | 30.7  | 103.83 | 539.3  | Wenjiang, Sichuan (CMA)    | city                   |
| 56196 | 31.47 | 104.67 | 470.8  | Mianyang, Sichuan (CMA)    | city                   |
| 56385 | 29.52 | 103.35 | 3137   | Mount Emei, Sichuan (CMA)  | county-level city      |
| 56651 | 26.95 | 100.3  | 2393.2 | Lijiang, Yunan (CMA)       | city                   |
| 56666 | 26.58 | 101.72 | 1190.1 | Panzhihua, Sichuan (CMA)   | city                   |
| 56739 | 25.12 | 98.48  | 1627.5 | Tengchong, Yunnan (CMA)    | county-level city      |
| 56778 | 25.02 | 102.68 | 1891.3 | Kunming, Yunnan (CMA)      | city                   |
| 56959 | 21.92 | 100.75 | 533    | Jinghong, Yunnan (CMA)     | county-level city      |
| 56985 | 23.33 | 103.38 | 1300.7 | Mengzi, Yunnan (CMA)       | county-level city      |
| 57083 | 34.72 | 113.65 | 109    | Zhengzhou, Henan (CMA)     | city                   |
| 57131 | 34.43 | 108.97 | 410    | Jinghe, Shannxi (CMA)      | city                   |
| 57178 | 33.03 | 112.58 | 129.2  | Nanyang, Henan (CMA)       | city                   |
| 57245 | 32.72 | 109.03 | 290.8  | Ankang, Shannxi (CMA)      | city                   |
| 57461 | 30.7  | 111.08 | 69.7   | Yichang, Hubei (CMA)       | city                   |
| 57494 | 30.63 | 114.28 | 23     | Wuhan, Hubei (CMA)         | city                   |
| 57516 | 29.58 | 106.47 | 259.1  | Shapingba, Chongqing (CMA) | city-governed district |
| 57604 | 28.78 | 105.38 | 368.8  | Naxi, Sichuan (CMA)        | city-governed district |
| 57649 | 28.32 | 109.73 | 206.6  | Jishou, Hunan (CMA)        | county-level city      |
| 57687 | 28.22 | 112.92 | 68     | Changsha, Hunan (CMA)      | city                   |
| 57816 | 26.57 | 106.7  | 1071.2 | Guiyang, Guizhou (CMA)     | city                   |
| 57874 | 26.42 | 112.4  | 116.6  | Changning, Hunan (CMA)     | county-level city      |
| 57957 | 25.33 | 110.3  | 166.7  | Guilin, Guangxi (CMA)      | city                   |
| 57993 | 25.83 | 114.83 | 124.8  | Ganzhou, Jiangxi (CMA)     | city                   |
| 58141 | 33.63 | 119.02 | 14.4   | Huaian, Jiangsu (CMA)      | city                   |
| 58208 | 32.17 | 115.67 | 56.9   | Gushi, Henan (CMA)         | county                 |
| 58238 | 32    | 118.8  | 8.9    | Nanjing, Jiangsu (CMA)     | city                   |
| 58265 | 32.07 | 121.6  | 5.5    | Lvsi, Jiangsu (CMA)        | town                   |
| 58321 | 31.88 | 117.25 | 23.6   | Hefei, Anhui (CMA)         | city                   |
| 58362 | 31.4  | 121.48 | 3.5    | Shanghai (CMA)             | city-governed district |
| 58457 | 30.32 | 120.2  | 7.2    | Hangzhou, Zhejiang (CMA)   | city                   |
| 58531 | 29.72 | 118.28 | 142.7  | Tunxi, Anhui (CMA)         | city-governed district |
| 58606 | 28.67 | 115.97 | 47     | Nanchang, Jiangxi (CMA)    | city                   |
| 58665 | 28.62 | 121.42 | 1.3    | Hongjia, Zhejiang (CMA)    | street                 |
| 58737 | 27.05 | 118.32 | 154.9  | Jianou, Fujian (CMA)       | county-level city      |
| 58847 | 26.08 | 119.28 | 88.4   | Fuzhou, Fujian (CMA)       | city                   |

|       |       |        |       |                            |                        |
|-------|-------|--------|-------|----------------------------|------------------------|
| 59287 | 23.13 | 113.32 | 11.3  | Guangzhou, Guangdong (CMA) | city                   |
| 59316 | 23.35 | 116.67 | 4.3   | Shantou, Guangdong (CMA)   | city                   |
| 59431 | 22.85 | 108.32 | 122.3 | Nanning, Guangxi (CMA)     | city                   |
| 59644 | 21.48 | 109.12 | 15.3  | Beihai, Guangxi (CMA)      | city                   |
| 59758 | 20    | 110.42 | 14.1  | Haikou, Hainan (CMA)       | city                   |
| 59948 | 18.23 | 109.52 | 5.5   | Sanya, Hainan (CMA)        | city                   |
| 59981 | 16.83 | 112.33 | 4.7   | Xisha, Hainan (CMA)        | city-governed district |

**Table S2.** A list of 40 CMIP6 models used in this study.

| Model name       | Modeling groups                                                                         | Resolution      |
|------------------|-----------------------------------------------------------------------------------------|-----------------|
| ACCESS-CM2       | Australian Research Council Centre of Excellence for Climate System Science, Australia  | 1.25° × 1.875°  |
| ACCESS-ESM1-5    | Australian Research Council Centre of Excellence for Climate System Science, Australia  | 1.25° × 1.875°  |
| AWI-CM-1-1-MR    | Alfred Wegener Institute, Helmholtz Centre for Polar and Marine Research (AWI), Germany | 1° × 1°         |
| AWI-ESM-1-1-LR   | Alfred Wegener Institute, Helmholtz Centre for Polar and Marine Research (AWI), Germany | 1.875° × 1.875° |
| BCC-CSM2-MR      | Beijing Climate Center, China Meteorological Administration, China                      | 1.125° × 1.125° |
| BCC-ESM1         | Beijing Climate Center, China Meteorological Administration, China                      | 2.81° × 2.81°   |
| CAMS-CSM1-0      | Chinese Academy of Meteorological Sciences, China                                       | 1.125° × 1.125° |
| CanESM5          | Canadian Centre for Climate, Canada                                                     | 2.81° × 2.81°   |
| CESM2            | National Center for Atmospheric Research, USA                                           | 0.9° × 1.25°    |
| CESM2-FV2        | National Center for Atmospheric Research, USA                                           | 1.875° × 2.5°   |
| CESM2-WACCM      | National Center for Atmospheric Research, USA                                           | 0.9° × 1.25°    |
| CESM2-WACCM-FV2  | National Center for Atmospheric Research, USA                                           | 1.875° × 2.5°   |
| CIESM            | Tsinghua University, China                                                              | 1° × 1°         |
| E3SM-1-0         | Lawrence Livermore National Laboratory, USA                                             | 1° × 1°         |
| E3SM-1-1         | Lawrence Livermore National Laboratory, USA                                             | 1° × 1°         |
| E3SM-1-1-ECA     | Lawrence Livermore National Laboratory, USA                                             | 1° × 1°         |
| EC-Earth3        | European EC-Earth consortium                                                            | 0.7° × 0.7°     |
| EC-Earth3-Veg    | European EC-Earth consortium                                                            | 0.7° × 0.7°     |
| EC-Earth3-Veg-LR | European EC-Earth consortium                                                            | 1.125° × 1.125° |
| FGOALS-f3-L      | Institute of Atmospheric Physics, Chinese Academy of Sciences, China                    | 1° × 1.25°      |
| FGOALS-g3        | Institute of Atmospheric Physics, Chinese Academy of Sciences, China                    | 1° × 1.25°      |
| GFDL-CM4         | Geophysical Fluid Dynamics Laboratory, USA                                              | 1.25° × 1°      |
| GFDL-ESM4        | Geophysical Fluid Dynamics Laboratory, USA                                              | 1.25° × 1°      |
| GISS-E2-1-G      | Goddard Institute for Space Studies, New York, USA                                      | 2° × 2.5°       |
| GISS-E2-1-G-CC   | Goddard Institute for Space Studies, New York, USA                                      | 2° × 2.5°       |
| GISS-E2-1-H      | Goddard Institute for Space Studies, New York, USA                                      | 2° × 2.5°       |

|                |                                                                                                                                       |                                      |
|----------------|---------------------------------------------------------------------------------------------------------------------------------------|--------------------------------------|
| INM-CM4-8      | Institute for Numerical Mathematics, Russia                                                                                           | $1.5^{\circ} \times 2^{\circ}$       |
| INM-CM5-0      | Institute for Numerical Mathematics, Russia                                                                                           | $1.5^{\circ} \times 2^{\circ}$       |
| IPSL-CM6A-LR   | Institute Pierre-Simon Laplace, France                                                                                                | $2.5^{\circ} \times 1.27^{\circ}$    |
| KACE-1-0-G     | National Institute of Meteorological Sciences/Korea<br>Meteorological Administration, Climate Research Division,<br>Republic of Korea | $1.25^{\circ} \times 1.85^{\circ}$   |
| MIROC6         | Japan Agency for Marine-Earth Science and Technology, Japan                                                                           | $1.4^{\circ} \times 1.4^{\circ}$     |
| MPI-ESM1-2-HAM | Max Planck Institute for Meteorology, Germany                                                                                         | $1.875^{\circ} \times 1.875^{\circ}$ |
| MPI-ESM1-2-HR  | Max Planck Institute for Meteorology, Germany                                                                                         | $0.9^{\circ} \times 0.9^{\circ}$     |
| MPI-ESM1-2-LR  | Max Planck Institute for Meteorology, Germany                                                                                         | $1.875^{\circ} \times 1.875^{\circ}$ |
| MRI-ESM2-0     | Meteorological Research Institute, Japan                                                                                              | $1.125^{\circ} \times 1.125^{\circ}$ |
| NESM3          | Nanjing University of Information Science and Technology,<br>China                                                                    | $1.875^{\circ} \times 1.875^{\circ}$ |
| NorESM2-LM     | Norwegian Climate Centre, Norway                                                                                                      | $2.5^{\circ} \times 1.875^{\circ}$   |
| NorESM2-MM     | Norwegian Climate Centre, Norway                                                                                                      | $1.25^{\circ} \times 0.9375^{\circ}$ |
| SAM0-UNICON    | Seoul National University, Korea                                                                                                      | $0.95^{\circ} \times 1.25^{\circ}$   |
| TaiESM1        | Research Center for Environmental Changes, Academia Sinica,<br>Chinese Taipei                                                         | $0.9^{\circ} \times 1.25^{\circ}$    |

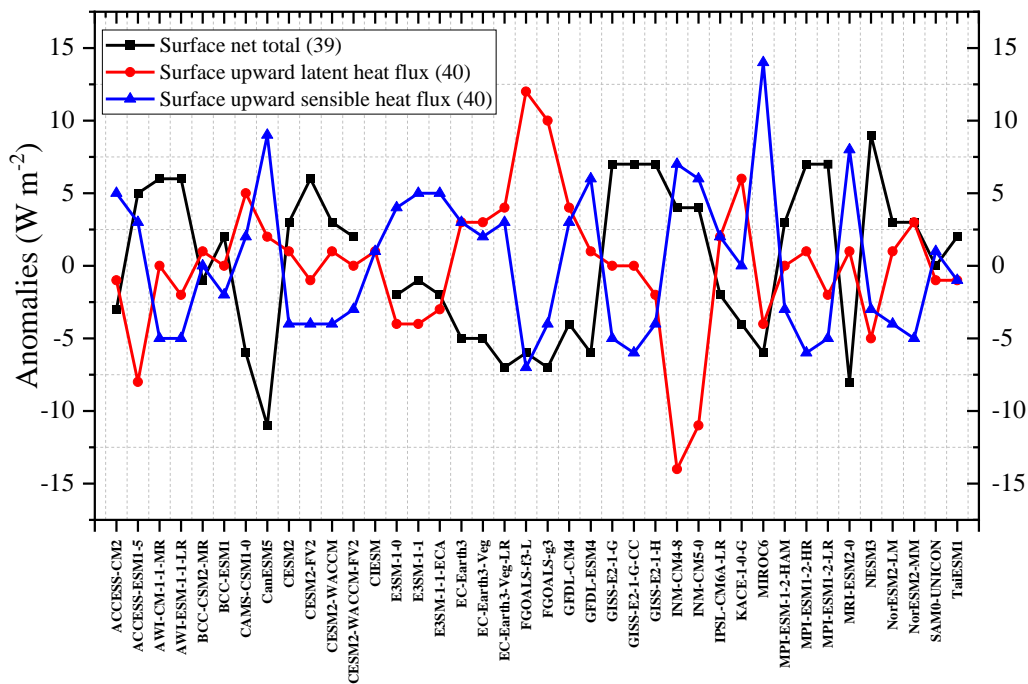

**Figure S2.** Annual land mean anomalies of surface net radiation (black line), latent heat fluxes (LH, red line), and sensible heat fluxes (SH, blue line) (Units:  $W m^{-2}$ ) with regard to their respective multi-model means over East Asia as simulated by various CMIP6 models, respectively. The numbers in the parentheses indicate the available CMIP6 climate models for the corresponding radiation components.

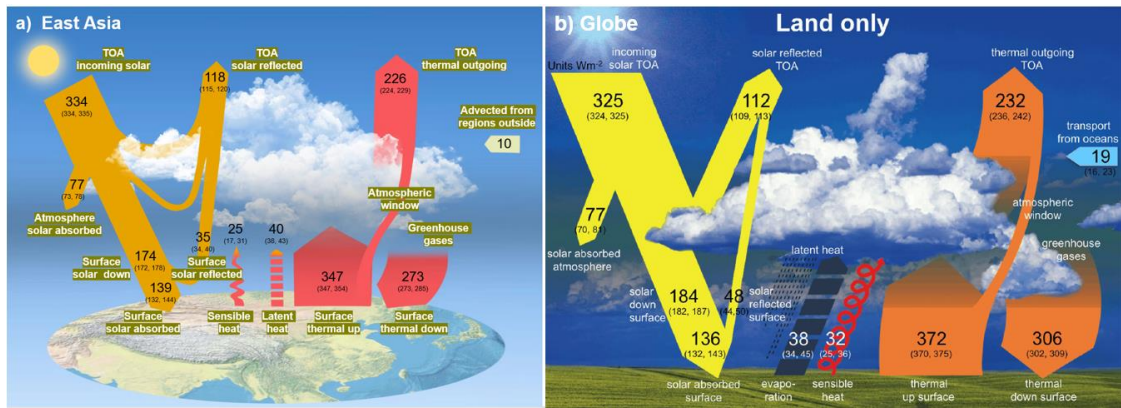

**Figure S3.** Comparisons of the present-day land mean energy balance diagrams over (a) East Asia (this study) and (b) globe (Wild et al. 2015), respectively, under all-sky conditions.

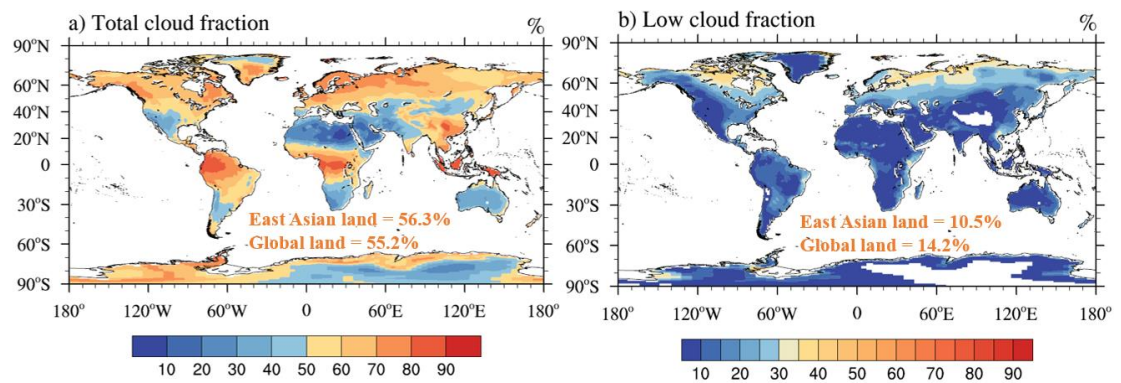

**Figure S4.** Distribution of global land mean (a) total and (b) low cloud fraction (CF) (Units: %) during 2010-2014. The clouds are derived from CERES\_SSF1deg Ed4.1 product, which show similar distribution pattern with that retrieved from MODIS documented by Fan et al. (2018). Moreover, the area-weighted averages of them over East Asian land and global land are 56.3% and 55.2%, as well as 10.5% and 14.2%, respectively, suggesting a slightly more total CF of 1.1% and fewer low CF of 3.7% over East Asian land compared to the global land.

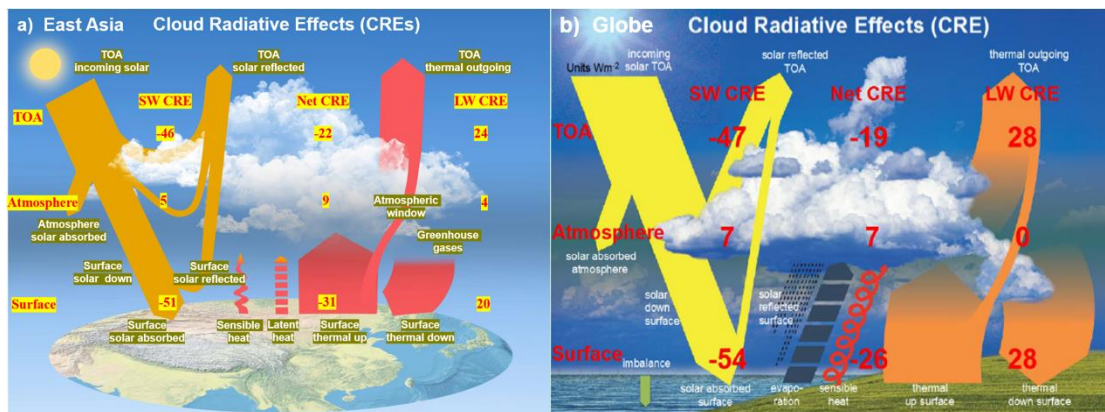

**Figure S5.** Comparisons of the present-day diagrams of the annual mean shortwave, longwave, and net (shortwave + longwave) cloud radiative effects (CREs) (Units:  $W m^{-2}$ ) at the TOA, within the

atmosphere, and at the surface over (a) East Asian land (this study) and (b) globe (Wild et al. 2019).

## **Detailed analyses on clear-sky energy budgets are given as follows.**

### *a. Shortwave components*

The annual East Asian land-mean anomalies of SW absorption at the TOA, within the atmosphere, and at the surface with regard to their respective multi-model means under clear-sky conditions as simulated by various CMIP6 models are displayed in Fig. 1b. More detailed summaries of the CMIP6 models with respect to its clear-sky budget, the multi-model mean, the corresponding estimates from the CERES and ERA5 are given in Table 1. Large variations appear among different models in terms of their clear-sky annual land-mean SW absorption at the TOA and surface over East Asia, with a range of 24 and 36  $\text{W m}^{-2}$  as well as a standard deviation of 6.9 and 7.8  $\text{W m}^{-2}$ , respectively (Fig. 1b; Table 1), both showing larger uncertainties than that under all-sky conditions (Fig. 1a; Table 1). The estimated multi-model mean TOA absorbed clear-sky SW radiation is 258  $\text{W m}^{-2}$ , differing by negative and positive deviations of 4 and 2  $\text{W m}^{-2}$  from the CERES- and ERA5-derived estimates of 262 and 256  $\text{W m}^{-2}$  (Table 1), respectively. The multi-model mean surface absorbed clear-sky SW radiation is estimated to be 189  $\text{W m}^{-2}$ , which is within 2  $\text{W m}^{-2}$  of the CERES-based estimate but differs as much as 10  $\text{W m}^{-2}$  from the ERA5 estimate (Table 1). Specifically, for the SW clear-sky absorption at the surface simulated by various models, although their absolute values are around 27% ( $\frac{257.5-189.1}{257.5} \times 100\%$ ) lower than at the TOA, they show a larger model spread and standard deviation between models (Table 1). Interestingly, despite the absolute values of the simulated SW absorption within the atmosphere under clear-sky conditions are slightly lower than that under all-sky conditions (69 vs. 73  $\text{W m}^{-2}$ ), they have the same model spread and standard deviation (19 and 3.8  $\text{W m}^{-2}$ ) (Table 1).

### *b. Best estimates for the surface downward SW radiation*

Contrary to the all-sky conditions (Fig. 1a), the discrepancies of the simulated clear-sky surface downward SW radiation among different models are notably smaller than the surface absorbed SW radiation (Fig. 2a), with their respective clear-sky spreads of 25 and 36  $\text{W m}^{-2}$  and standard deviations of 4.6 and 7.8  $\text{W m}^{-2}$  (Table 1). Although the absolute values of the clear-sky SW downward radiation are larger than that under all-sky conditions, the relative discrepancy among different models with respect to the multi-model mean is much smaller, at around 10% ( $\frac{25}{242} \times 100\%$ ) and 18% ( $\frac{33}{186} \times 100\%$ ), respectively (Table 1).

In order to obtain more accurate SW downward radiation at the surface, we make use of the surface observations to reduce the uncertainties induced by various models. The clear-sky surface observational sites in China are taken from the homogenized monthly SSR data from the CMA (Yang et al. 2018, 2019), while we utilize the clear-sky CERES-interpolated estimates at the corresponding GEBA sites for the remaining East Asian sites as introduced above in Section 2.1.



Fig. 3b shows the distributions of the annual mean surface SW clear-sky radiation at 92 stations and the collocated rural and urban stations over East Asia. The high values of the clear-sky surface downward SW radiation are mainly located in the TP, with the highest value larger than  $282 \text{ W m}^{-2}$  (Naqu, Tibet) and an abnormal high value of  $279 \text{ W m}^{-2}$  located in Changning, Hunan (located at the southern China). For the convenience of comparison with the surface observations, the grid values from the multi-model mean, CERES, and ERA5 are then interpolated to the corresponding surface sites. The distributions of the annual mean biases of clear-sky surface downward SW radiation from different data sources (e.g., the CERES, multi-model mean, and ERA5) against surface observations (Figs. 7a, c, and e) as well as the corresponding comparisons of their respective annual land means at the surface sites with their observed counterparts are given in Figs. 7 b, d, and f. The CERES-derived clear-sky surface SW radiation is mainly overestimated in central and western China, with the maximum value reaching  $40 \text{ W m}^{-2}$ , which is distributed in the eastern TP and Xinjiang province (located at the northwestern China), while the slight underestimations are mainly located in northeastern, Eastern, and Southern China, within a range of  $10 \text{ W m}^{-2}$  (Fig. 7a). Both the distribution patterns and magnitudes of the clear-sky SSR biases from the CMIP6 multi-model mean and ERA5 estimates against the ground-based observations are consistent with each other, except for some individual sites over northeastern Inner Mongolia, eastern China, western Mongolia, and Japan (Figs. 7c and e). The clear-sky annual East Asian land means of surface solar radiation derived from CERES, CMIP6 multi-model mean, and ERA5 agree reasonably well with the surface observations, but with smaller correlation coefficients ranging from 0.78 to 0.82 compared to the all-sky conditions (Figs. 7b, d, and f). Based on the corresponding station mean biases at the surface observational sites listed in Table 2, the annual land mean surface solar radiation is significantly overestimated in the CMIP6 multi-model mean and ERA5 by  $9.07$  and  $5.72 \text{ W m}^{-2}$ , respectively, while much smaller overestimation appears in CERES with station mean bias of  $0.35 \text{ W m}^{-2}$ . The even distributed surface sites of overestimations and underestimations contribute to the small station mean bias in CERES-derived surface solar radiation (Fig. 7b), while more underestimations in rural stations (Fig. 7b) result in the negative rural station mean bias (Table 2). However, the urban and rural stations in ERA5, especially in CMIP6 multi-model mean, show high overestimations at surface sites, among which the urban stations are generally more overestimated than the rural stations (Figs. 7d and f; Table 2). On average, the annual East Asian land-mean area-weighted averages of clear-sky surface downward SW radiation from CERES, CMIP6 multi-model mean, and ERA5 all overestimate the surface observed counterpart of  $230 \text{ W m}^{-2}$ , with much higher biases of around  $6$ ,  $12$ , and  $8 \text{ W m}^{-2}$ , respectively (Table 3). More negative biases over northeastern Inner Mongolia in ERA5 (Figs. 7c and e) are the reason for a closer area-weighted average surface SW clear-sky downward radiation with respect to the surface observations (Table 3) compared to that in CMIP6 multi-model mean.

Similar to the all-sky conditions, the best estimate for the surface downward SW clear-sky radiation is calculated based on the linear regression analysis on the model biases of various models

at 92 sites against their regional land means over East Asia, following again the methodology introduced in Wild et al. (2015). As shown in Fig. 6b, the correlation coefficient between them is 0.94, a little lower than the all-sky counterpart, suggesting that the higher clear-sky East Asian land mean value of a climate model comes with a stronger overestimation against ground-based observations. Thus, a best estimate for the clear-sky SSR is determined through the intersection between the linear regression line and zero bias line derived from the model biases with respect to the surface observations, that is  $234 \pm 1.1 \text{ W m}^{-2}$  ( $2\sigma$  uncertainty). This best estimate is around 2 and 4  $\text{W m}^{-2}$  lower than the respective estimates from the CERES and ERA5 (Fig. 6b), which is similar to those under all-sky conditions (Fig. 6a). Likewise, most of the climate models (33/35) tend to overestimate the observed clear-sky downward solar radiation at the surface, with a multi-model mean overestimation of  $9.1 \text{ W m}^{-2}$ .

### *c. Longwave components*

The simulated annual East Asian land-mean anomalies of clear-sky net LW radiation at the TOA, within the atmosphere, and at the surface with respect to their respective multi-model means by various CMIP6 models are shown in Fig. 1d, along with more detailed model information and CERES- and ERA5-derived estimates (Table 1). From the TOA to surface, the simulated net LW radiation varies in a range of 15, 16, and 18  $\text{W m}^{-2}$ , with a standard deviation of 3.2, 3.6, and 4.1  $\text{W m}^{-2}$ , respectively, indicating that the discrepancies become larger between models as well as their relative discrepancies (6.1%, 11%, and 19%), which is similar to that under all-sky conditions but with smaller standard deviations (Table 1). Ultimately, the simulated East Asian multi-model mean net clear-sky LW radiation at the TOA, within the atmosphere, and at the surface is estimated to be -247, -151, and -95  $\text{W m}^{-2}$ , respectively, which are very close to the estimates from the CERES and ERA5, with respective discrepancies within 3 and 1  $\text{W m}^{-2}$  (Table 1). However, as can be seen from Fig. 2b and Table 1, the estimated East Asian annual land-mean surface downward and upward LW fluxes under clear-sky conditions differ greatly between models, with large standard deviations of 6.8 and 7.1  $\text{W m}^{-2}$  and multi-model means of 256 and -351  $\text{W m}^{-2}$ , respectively. Their deviations from the corresponding estimates from the CERES and ERA5 are no more than 2 and 4  $\text{W m}^{-2}$ , respectively, which is significantly smaller than those under all-sky conditions (Table 1).

### *d. Discussion of land energy balance over East Asia under clear-sky conditions*

According to the above-mentioned estimates of the energy balance components under clear-sky conditions, a similar diagram of the present-day annual land-mean energy balance over East Asia is given in the Fig. 6b. It's noteworthy that the estimated magnitudes of clear-sky radiative components in this figure only represent the removal of cloud while the other atmospheric conditions remain the same as under all-sky conditions, which allows to study cloud effects. The TOA energy budgets under clear-sky conditions are also given by the most advanced CERES-derived product, with the estimated annual land-mean reflected solar radiation and OLR at the TOA of -72 and -250  $\text{W m}^{-2}$ , respectively. The uncertainty ranges of clear-sky SW and LW TOA fluxes

(Fig. 6b) are according to Loeb et al. (2018), which documented the regional uncertainties of 5.4 and 4.6 W m<sup>-2</sup>, respectively, twice of those for all-sky conditions.

As discussed in section 4.2, the best estimate for the clear-sky annual land-mean SSR is 234 W m<sup>-2</sup>, the lower value of uncertainty range is given by the lowest individual model estimate, while the higher value is from the CERES-derived estimate, that is 228–236 W m<sup>-2</sup> (Fig. 6b). Similar to the all-sky conditions, the calculated clear-sky radiation weighted surface albedo is near 0.19 (44.8/235.6), the resulting surface reflected and absorbed SW fluxes are -44 and 190 W m<sup>-2</sup>, respectively. Additionally, the corresponding estimates of surface albedos from the multi-model mean and ERA5 are 0.218 (52.7/241.8) and 0.247 (58.9/238.2), respectively, which largely differ from the CERES-derived estimate, particularly for the estimate from ERA5 reanalysis, showing a similar tendency with that under all-sky conditions. Again, the uncertainty range of the estimated reflected surface solar radiation is given by the various models, multi-model mean, and CERES-based estimate, ranging from 40 to 53 W m<sup>-2</sup>, while the counterparts of the absorbed SW radiation are based on the multi-model mean, CERES, and ERA5 estimates, in a range of 175 and 196 W m<sup>-2</sup>. Consequently, the atmospheric SW absorption is estimated to be 72 W m<sup>-2</sup>, with its uncertainty range of 69–77 W m<sup>-2</sup> determined by the different individual estimates outlined above.

According to the ERA5 reanalysis, the clear-sky annual East Asian land-mean surface upward and downward LW radiation are estimated to be -347 and 253 W m<sup>-2</sup>, with uncertainty ranges of 253–256 and 347–353 W m<sup>-2</sup>, respectively, referring to the estimates from different data sources. The clear-sky net LW fluxes at the surface and within the atmosphere are then calculated to be -94 and -156 W m<sup>-2</sup>, respectively.

In summary, for clear-sky conditions over East Asian land, about 21.6% of the TOA incoming solar radiation is absorbed by the atmosphere, while around 56.9% is absorbed at the Earth's surface. However, the all-sky atmospheric and surface solar absorption account for 23.1% and 41.6% of the TOA incident solar radiation, respectively, implying that the existence of clouds results in more SW absorption within the atmosphere of around 1.5% and much less solar absorption of around 15.3% at the surface with respect to the TOA incoming solar radiation.
